# Supplementary material for: The structural and electronic properties of NbSin−/0(n = 3–12) clusters: anion photoelectron spectroscopy and ab initio calculations
Source: Royal Society of Chemistry journal article supplement (doi:10.1039/c6nr07480d), 2016-01-01
Supplement: c6nr07480d1.pdf [file c6nr07480d1.pdf]

## *Supporting Information*

### **Structural and Electronic Properties of NbSi<sub>n</sub><sup>-/0</sup> (n = 3-12) Clusters: Anion Photoelectron Spectroscopy and *ab initio* Calculations**

Sheng-Jie Lu<sup>1,2</sup>, Guo-Jin Cao<sup>3</sup>, Xi-Ling Xu<sup>1,2</sup>, Hong-Guang Xu<sup>1,2,\*</sup>, and Wei-Jun Zheng<sup>1,2,\*</sup>

<sup>1</sup> *Beijing National Laboratory for Molecular Sciences, State Key Laboratory of Molecular Reaction  
Dynamics, Institute of Chemistry, Chinese Academy of Sciences, Beijing 100190, China*

<sup>2</sup> *University of Chinese Academy of Sciences, Beijing 100049, China*

<sup>3</sup> *Institute of Molecular Science, Shanxi University, Taiyuan 030006, China*

\* Corresponding authors. E-mail: xuhong@iccas.ac.cn, zhengwj@iccas.ac.cn

Tel: +86 10 62635054, Fax: +86 10 62563167

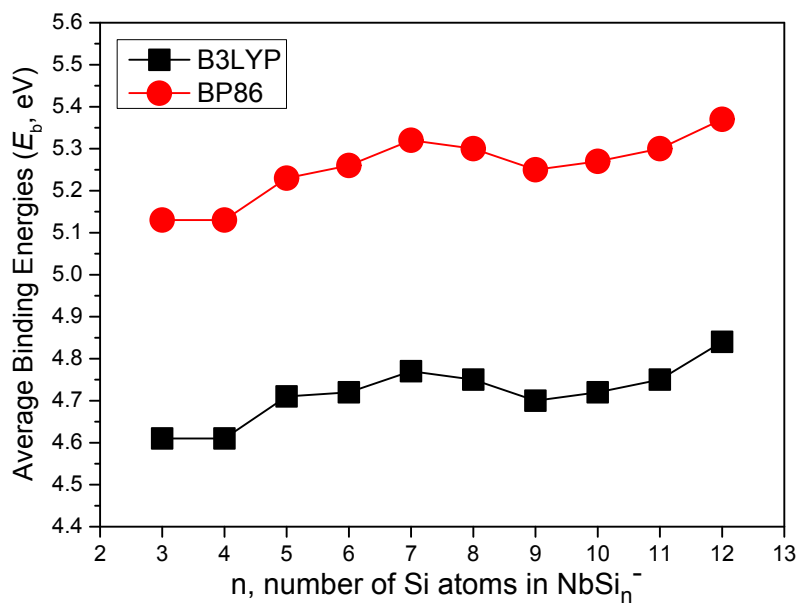

**Fig. S1.** The Average Binding Energies ( $E_b$ ) per atom of  $\text{NbSi}_n^-$  ( $n = 3-12$ ) clusters as the function of the cluster sizes using the B3LYP and BP86 functionals. ( $E_b(n) = [E(\text{Nb}^-) + nE(\text{Si}) - E(\text{NbSi}_n^-)]/(n + 1)$ , the  $E$  represents the total energy including zero-point vibrational corrections.)

**Average Binding Energies.** In Fig. S1, we can see that  $\text{NbSi}_{12}^-$  has the highest average binding energy ( $E_b$ ) per atom, suggesting that  $\text{NbSi}_{12}^-$  is very stable. Also, it is seen that the average binding energies ( $E_b$ ) per atom are more overestimate by the BP86 functional than the B3LYP functional with average derivations of  $\sim 0.50$  eV.

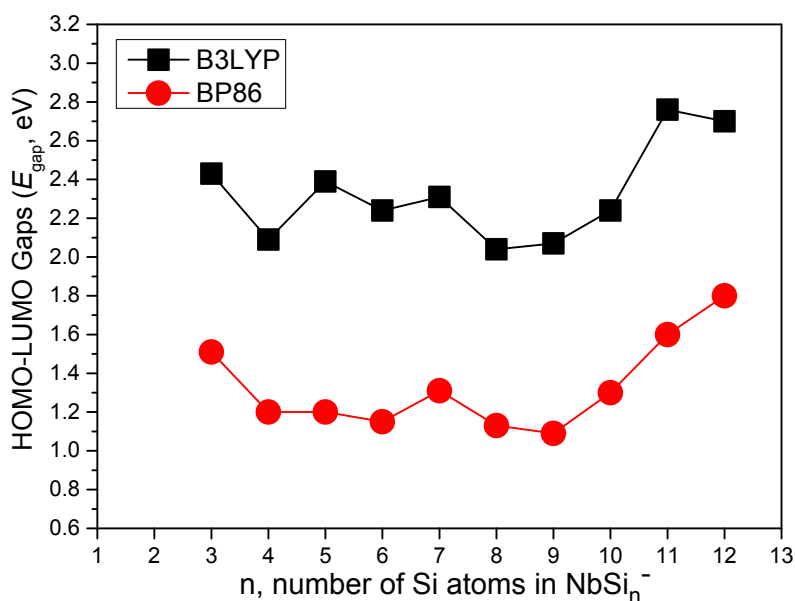

**Fig. S2.** The HOMO-LUMO Gaps ( $E_{\text{gap}}$ ) of  $\text{NbSi}_n^-$  ( $n = 3-12$ ) clusters as the function of the cluster sizes using the B3LYP and BP86 functionals.

**HOMO-LUMO Gaps.** The HOMO-LUMO gaps obtained by the different functionals are similar to the  $E_b$  values with the increasing tendency along with the increasing Si atoms. The large HOMO-LUMO gaps suggest that these Nb atom doped silicon clusters are kinetically stable. Comparing the  $E_{\text{gap}}$  values obtained by the B3LYP functional with those calculated using the BP86 functional, we can find that the  $E_{\text{gap}}$  values calculated by the B3LYP functional are systematically larger than the BP86 functional with the average deviation of  $\sim 1.00$  eV, which is consistent with the previous works (J. Am. Chem. Soc., 2010, **132**, 15589-15602; J. Comput. Chem., 2016, **37**, 2316-2323.).

Taking the  $E_b$  and  $E_{\text{gap}}$  values of  $\text{NbSi}_n^-$  ( $n = 3-12$ ) clusters into account, we can find that the  $\text{NbSi}_{12}^-$  cluster has higher chemical stability and can be regarded as the magic cluster for the  $\text{NbSi}_n^-$  clusters.

**Table S1.** Cartesian coordinates for stable isomers of NbSi<sub>3-12</sub><sup>-0</sup> clusters.

| NbSi <sub>3</sub> <sup>-</sup> |             |             |             |    |             |             |             |
|--------------------------------|-------------|-------------|-------------|----|-------------|-------------|-------------|
| 3A                             |             |             | 3B          |    |             |             |             |
|                                | X           | Y           | Z           |    | X           | Y           | Z           |
| Si                             | 1.29922780  | -0.75010952 | 0.90674907  | Si | 0.00000000  | -1.93163364 | 0.52723281  |
| Si                             | -0.00000000 | 1.50021904  | 0.90674907  | Si | 0.00000000  | -0.00000000 | 1.71380992  |
| Si                             | -1.29922780 | -0.75010952 | 0.90674907  | Si | -0.00000000 | 1.93163364  | 0.52723281  |
| Nb                             | 0.00000000  | 0.00000000  | -0.92883186 | Nb | 0.00000000  | -0.00000000 | -0.94528708 |
| Si                             | 1.29922780  | -0.75010952 | 0.90674907  | Si | 0.00000000  | -1.93163364 | 0.52723281  |
| NbSi <sub>4</sub> <sup>-</sup> |             |             |             |    |             |             |             |
| 4A                             |             |             | 4B          |    |             |             |             |
|                                | X           | Y           | Z           |    | X           | Y           | Z           |
| Si                             | 0.00487500  | 0.47485900  | 1.66374200  | Si | 0.04757008  | 1.54956768  | -1.16540485 |
| Si                             | -1.90584600 | 0.42551700  | -0.26506000 | Si | 0.04757008  | 1.54956768  | 1.16540485  |
| Si                             | 1.90695900  | 0.41515600  | -0.26885600 | Si | -0.26581761 | -0.38069594 | -2.38892895 |
| Si                             | 0.00368800  | 1.80538800  | -0.61638100 | Si | -0.26581761 | -0.38069594 | 2.38892895  |
| Nb                             | -0.00330400 | -1.06568000 | -0.17532300 | Nb | 0.14923129  | -0.79764075 | 0.00000000  |
| NbSi <sub>5</sub> <sup>-</sup> |             |             |             |    |             |             |             |
| 5A                             |             |             | 5B          |    |             |             |             |
|                                | X           | Y           | Z           |    | X           | Y           | Z           |
| Si                             | -0.00000000 | -0.00000000 | 2.01855801  | Si | 0.76188400  | 1.13601600  | -1.28732300 |
| Si                             | 0.00000000  | 1.88358649  | 0.39287762  | Si | -1.64127800 | 1.10517800  | -0.66272200 |
| Si                             | 0.00000000  | -1.88358649 | 0.39287762  | Si | -0.09979400 | 1.42150500  | 1.16297500  |
| Si                             | 1.88358649  | 0.00000000  | 0.39287762  | Si | 1.96660300  | 0.29747700  | 0.83945600  |
| Si                             | -1.88358649 | -0.00000000 | 0.39287762  | Si | -1.84143900 | -0.77826800 | 0.76250300  |
| Nb                             | 0.00000000  | 0.00000000  | -1.21938499 | Nb | 0.29161800  | -1.08650500 | -0.27825500 |
| 5C                             |             |             | 5D          |    |             |             |             |
|                                | X           | Y           | Z           |    | X           | Y           | Z           |
| Si                             | 1.79510646  | 1.62668973  | 0.00000000  | Si | -1.16821200 | -0.59393000 | 1.36733400  |
| Si                             | -0.97537797 | -0.78299878 | -1.27950404 | Si | -1.16821200 | 1.41360900  | 0.00000000  |
| Si                             | -2.65496773 | 0.57418153  | 0.00000000  | Si | -1.16821200 | -0.59393000 | -1.36733400 |
| Si                             | -0.48403858 | 1.36905114  | 0.00000000  | Si | -0.34703700 | -2.34487300 | 0.00000000  |
| Nb                             | 1.12494705  | -0.68523815 | 0.00000000  | Si | 0.98667000  | 2.30609100  | 0.00000000  |
| Si                             | -0.97537797 | -0.78299878 | 1.27950404  | Nb | 0.97829400  | -0.06384200 | 0.00000000  |

NbSi<sub>6</sub><sup>-</sup>

| 6A |             |             | 6B          |    |             |             |             |
|----|-------------|-------------|-------------|----|-------------|-------------|-------------|
|    | X           | Y           | Z           |    | X           | Y           | Z           |
| Si | 2.21292400  | -0.00000100 | -0.24924000 | Si | 0.01413033  | 2.29178469  | -0.01717416 |
| Si | 0.85764300  | -1.91584500 | -0.11155900 | Si | -1.79470381 | 1.05085692  | -0.89209169 |
| Si | 0.64455400  | 0.00000000  | 1.74934400  | Si | -1.99180892 | -1.13365512 | -0.01717416 |
| Si | -1.34485200 | -1.40570300 | 0.85896900  | Si | -0.01271688 | -2.07968755 | -0.89209169 |
| Si | 0.85764600  | 1.91584400  | -0.11155900 | Si | 1.97767860  | -1.15812956 | -0.01717416 |
| Si | -1.34485000 | 1.40570600  | 0.85896800  | Si | 1.80742069  | 1.02883063  | -0.89209169 |
| Nb | -0.64299800 | 0.00000000  | -1.02265600 | Nb | -0.00000000 | 0.00000000  | 0.93142594  |

  

| 6C |             |             | 6D          |    |             |             |             |
|----|-------------|-------------|-------------|----|-------------|-------------|-------------|
|    | X           | Y           | Z           |    | X           | Y           | Z           |
| Si | -0.62442932 | 2.40950015  | 0.17241431  | Si | 2.15732275  | 0.88359513  | 0.00000000  |
| Si | -1.00537865 | 0.71100860  | -1.38928204 | Si | 0.13365342  | 1.37128023  | 1.31932656  |
| Si | 1.48789119  | 1.49153000  | -0.34819425 | Si | 1.10807290  | -1.07768053 | -1.31988075 |
| Si | 0.62442932  | -2.40950015 | 0.17241431  | Si | 0.13365342  | 1.37128023  | -1.31932656 |
| Si | 1.00537865  | -0.71100860 | -1.38928204 | Si | 1.10807290  | -1.07768053 | 1.31988075  |
| Si | -1.48789119 | -1.49153000 | -0.34819425 | Nb | -0.93459270 | -0.94693742 | 0.00000000  |
| Nb | -0.00000000 | 0.00000000  | 1.06893786  | Si | -1.90274192 | 1.30233334  | 0.00000000  |

NbSi<sub>7</sub><sup>-</sup>

| 7A |             |             | 7B          |    |             |             |             |
|----|-------------|-------------|-------------|----|-------------|-------------|-------------|
|    | X           | Y           | Z           |    | X           | Y           | Z           |
| Si | 2.47578900  | -0.00001600 | -0.03749100 | Si | -1.74359529 | -1.18239877 | 0.00000000  |
| Si | 0.96934000  | -1.95692700 | -0.12031400 | Si | 0.48970539  | -2.54317830 | 0.00000000  |
| Si | 0.84842600  | 0.00001900  | 1.68918100  | Si | -0.05995874 | -0.86479420 | 1.76811746  |
| Si | -1.08484100 | -1.47248200 | 1.04666900  | Si | 1.89791393  | -0.27607064 | 0.00000000  |
| Si | 0.96934300  | 1.95693400  | -0.12032700 | Si | 0.96720474  | 1.22233858  | -1.71800286 |
| Si | -1.08485900 | 1.47247900  | 1.04666900  | Si | 0.96720474  | 1.22233858  | 1.71800286  |
| Si | -2.51112500 | -0.00001400 | -0.20212000 | Si | -0.05995874 | -0.86479420 | -1.76811746 |
| Nb | -0.19875700 | 0.00000200  | -1.12760300 | Nb | -0.83909074 | 1.12203201  | 0.00000000  |

  

| 7C |             |             | 7D          |    |             |             |             |
|----|-------------|-------------|-------------|----|-------------|-------------|-------------|
|    | X           | Y           | Z           |    | X           | Y           | Z           |
| Si | 0.49540907  | -1.30512794 | -1.96544355 | Si | -0.80917600 | -1.93806000 | 0.48085000  |
| Si | 1.83899917  | -1.08806267 | 0.00000000  | Si | -1.69993300 | 0.01215700  | 1.69569300  |
| Si | 0.49540907  | -1.30512794 | 1.96544355  | Si | 0.63863300  | 0.01158000  | 1.49588700  |
| Si | 0.43736936  | 0.96510608  | 1.44275648  | Si | -0.80923000 | 1.94440500  | 0.45397900  |
| Si | -1.46262731 | 1.54077571  | 0.00000000  | Si | 1.26260400  | -1.27811800 | -0.73509900 |
| Si | 0.72980944  | 2.83095012  | 0.00000000  | Si | 1.26241200  | 1.26665400  | -0.75448200 |
| Si | 0.43736936  | 0.96510608  | -1.44275648 | Nb | -0.92268700 | -0.00780700 | -1.09293800 |
| Nb | -1.01592786 | -0.88887620 | 0.00000000  | Si | 2.85684600  | 0.00424600  | 0.56391900  |

NbSi<sub>8</sub><sup>-</sup>

| 8A |             |             | 8B          |    |             |             |             |
|----|-------------|-------------|-------------|----|-------------|-------------|-------------|
| X  | Y           | Z           | X           | Y  | Z           |             |             |
| Si | -0.00000100 | -1.97570700 | 0.73655600  | Si | 0.95545328  | 1.91006312  | 0.00000000  |
| Si | 0.00000100  | 1.97570800  | 0.73655400  | Si | -3.06085883 | 0.94027947  | 0.00000000  |
| Si | -2.14875300 | -1.23966000 | -0.42479000 | Si | 2.64097909  | 0.24626976  | 0.00000000  |
| Si | -2.14874500 | 1.23966700  | -0.42478800 | Si | -2.04284908 | -1.32512087 | 0.00000000  |
| Si | 2.14875100  | -1.23966300 | -0.42478500 | Si | 1.15667892  | 0.21278376  | 2.03004306  |
| Si | 2.14874700  | 1.23966400  | -0.42479100 | Si | 1.15667892  | 0.21278376  | -2.03004306 |
| Si | 1.37091600  | 0.00000100  | 1.63488200  | Si | -1.02631397 | 0.64049586  | 1.25947626  |
| Si | -1.37091600 | -0.00000300 | 1.63488100  | Si | -1.02631397 | 0.64049586  | -1.25947626 |
| Nb | 0.00000000  | -0.00000200 | -1.03931900 | Nb | 0.42565193  | -1.19222113 | 0.00000000  |
| 8C |             |             | 8D          |    |             |             |             |
| X  | Y           | Z           | X           | Y  | Z           |             |             |
| Si | 0.85225760  | -0.92103912 | 2.50188837  | Si | 1.59801800  | -0.18640700 | 1.65390100  |
| Si | -0.39854162 | 1.14351745  | 1.94567505  | Si | 0.86042500  | 1.99611200  | 0.24135200  |
| Si | 0.40345038  | 2.28191121  | 0.00000000  | Si | -1.06850600 | 1.26888100  | -1.06494300 |
| Si | 0.85225760  | -0.92103912 | -2.50188837 | Si | -0.07920000 | -1.89047900 | 1.15345500  |
| Si | -0.39854162 | 1.14351745  | -1.94567505 | Si | -1.91728000 | -1.09008900 | -0.65713800 |
| Si | -1.11385732 | -1.43061457 | -1.24159686 | Si | -2.98173600 | 0.79680600  | 0.47217500  |
| Si | -1.11385732 | -1.43061457 | 1.24159686  | Si | -0.78345300 | 0.49488500  | 1.33920900  |
| Si | -1.86585477 | 0.62274868  | 0.00000000  | Si | 2.66291300  | 0.61119600  | -0.41788500 |
| Nb | 0.95012611  | -0.16677619 | 0.00000000  | Nb | 0.58349900  | -0.68323600 | -0.92882300 |

NbSi<sub>9</sub><sup>-</sup>

|    |             |             |             | 9A |             |             | 9B          |   |   |
|----|-------------|-------------|-------------|----|-------------|-------------|-------------|---|---|
|    |             |             |             | X  | Y           | Z           | X           | Y | Z |
| Si | 2.11707454  | -1.22229356 | 0.10479720  | Nb | -0.11770100 | -0.28538900 | -0.81163700 |   |   |
| Si | 2.18248137  | 1.26005621  | -0.79445856 | Si | -2.12411800 | 1.41608600  | -0.21126800 |   |   |
| Si | -0.00000000 | 2.44458711  | 0.10479720  | Si | -2.66247500 | -0.71925300 | -1.15217000 |   |   |
| Si | -2.18248137 | 1.26005621  | -0.79445856 | Si | -1.81572000 | -1.01964700 | 1.14493400  |   |   |
| Si | 0.00000000  | -2.52011242 | -0.79445856 | Si | 0.48710300  | -1.73252200 | 1.30714800  |   |   |
| Si | -2.11707454 | -1.22229356 | 0.10479720  | Si | -0.61088600 | 1.19830600  | 1.69038900  |   |   |
| Si | 0.00000000  | -1.46805816 | 1.57419389  | Si | 0.54426100  | 2.08850100  | -0.34571300 |   |   |
| Si | 1.27137566  | 0.73402908  | 1.57419389  | Si | 1.68995600  | 0.34640400  | 1.34291200  |   |   |
| Si | -1.27137566 | 0.73402908  | 1.57419389  | Si | 2.75948900  | 0.78900500  | -0.72713200 |   |   |
| Nb | -0.00000000 | -0.00000000 | -0.90583395 | Si | 2.07708500  | -1.53110000 | -0.67216500 |   |   |
|    |             |             |             | 9C |             |             | 9D          |   |   |
|    |             |             |             | X  | Y           | Z           | X           | Y | Z |
| Nb | -0.41109000 | -0.53661100 | -0.00294000 | Si | 0.00000000  | 0.00000000  | 3.02132199  |   |   |
| Si | -2.86685700 | 0.48274500  | -0.00488700 | Si | -0.40759218 | 2.56233606  | -0.23512185 |   |   |
| Si | -2.86647400 | -1.69251200 | 0.00016000  | Si | 1.10923194  | -0.71175179 | -1.91445805 |   |   |
| Si | 1.15134300  | -0.81544200 | 1.96328100  | Si | 1.09276486  | 1.67932821  | -1.96600589 |   |   |
| Si | -1.15092800 | 1.99842700  | 0.00516700  | Si | -1.09276486 | -1.67932821 | -1.96600589 |   |   |
| Si | 0.53177100  | 1.47147500  | 1.63586400  | Si | 0.40759218  | -2.56233606 | -0.23512185 |   |   |
| Si | 0.53522100  | 1.48302100  | -1.62423200 | Si | 0.00430894  | -2.08718308 | 2.03903685  |   |   |
| Si | 2.26502200  | 0.90499200  | 0.00602200  | Si | -1.10923194 | 0.71175179  | -1.91445805 |   |   |
| Si | 1.15574200  | -0.80185900 | -1.96830600 | Si | -0.00430894 | 2.08718308  | 2.03903685  |   |   |
| Si | 2.44906500  | -1.45934500 | -0.00445900 | Nb | 0.00000000  | -0.00000000 | 0.38281399  |   |   |

NbSi<sub>10</sub><sup>-</sup>

| 10A |             |             | 10B         |    |             |             |             |
|-----|-------------|-------------|-------------|----|-------------|-------------|-------------|
|     | X           | Y           | Z           |    | X           | Y           | Z           |
| Si  | -0.63954400 | 2.64910800  | -0.44197000 | Si | 2.15746200  | -0.23199800 | 1.47154600  |
| Si  | -2.52477600 | -1.12536400 | -0.17107000 | Si | 2.02063800  | -2.13762700 | -0.00743500 |
| Si  | 1.54548700  | -2.09162400 | -0.15570100 | Si | -2.47610400 | -1.65767400 | -0.00595200 |
| Si  | -0.76149400 | -2.62099400 | -0.42809300 | Si | 2.15695800  | -0.22268900 | -1.47352700 |
| Si  | -0.35315300 | 1.27763200  | 1.70340900  | Si | 1.60052900  | 1.62587100  | 0.00547100  |
| Si  | 1.79230300  | -0.04236700 | 1.38599100  | Si | -0.00879900 | 0.97914000  | 2.07084700  |
| Si  | 2.54929700  | -0.06071600 | -0.94149200 | Si | -2.19996800 | 0.02706500  | 1.63533700  |
| Si  | 1.64019500  | 2.01613300  | -0.15634100 | Si | -2.20057900 | 0.03976200  | -1.63427300 |
| Si  | -0.41930500 | -1.24353300 | 1.70834900  | Si | -0.00926800 | 0.99434700  | -2.06399700 |
| Si  | -2.46831700 | 1.23820500  | -0.16294100 | Nb | -0.13899100 | -0.60152500 | -0.00224300 |
| Nb  | -0.12316400 | 0.00120200  | -0.79907300 | Si | -0.63382300 | 2.34541000  | 0.00855100  |
| 10C |             |             | 10D         |    |             |             |             |
|     | X           | Y           | Z           |    | X           | Y           | Z           |
| Nb  | 0.27738300  | 0.01284900  | -0.48409500 | Si | 0.62044580  | -2.17031489 | -1.23319436 |
| Si  | 2.61275700  | -1.35285900 | 0.13611000  | Si | 0.62044580  | -2.17031489 | 1.23319436  |
| Si  | 2.60620900  | 0.48842700  | -1.36668200 | Si | 0.99041308  | -0.37951764 | 2.73850395  |
| Si  | 2.07539100  | 1.86300300  | 0.41942100  | Si | -0.00158278 | 1.84359033  | -2.06382763 |
| Si  | -0.12734700 | 1.77157900  | 1.37972100  | Si | 0.99041308  | -0.37951764 | -2.73850395 |
| Si  | 0.47450600  | -2.27939000 | 0.69131400  | Si | -1.32424902 | -0.34519054 | -1.99985599 |
| Si  | -0.39983200 | -0.52413900 | 2.14019900  | Si | -1.59374311 | -1.58309386 | 0.00000000  |
| Si  | -1.71850900 | -2.01220800 | -0.54405700 | Si | -1.32424902 | -0.34519054 | 1.99985599  |
| Si  | -2.40003400 | -0.04797200 | 0.69319100  | Si | -0.00158278 | 1.84359033  | 2.06382763  |
| Si  | -1.94519900 | 0.02697400  | -1.80070700 | Si | -0.09347662 | 2.94014097  | 0.00000000  |
| Si  | -1.99027800 | 2.02895600  | -0.33080300 | Nb | 0.38174909  | 0.25532492  | 0.00000000  |



NbSi<sub>11</sub><sup>-</sup>

|    |             | 11A         |             |    | 11B         |             |             |
|----|-------------|-------------|-------------|----|-------------|-------------|-------------|
|    |             | X           | Y           | Z  | X           | Y           | Z           |
| Si | 1.30429990  | -2.20683605 | -0.28438689 | Si | 0.18662900  | 2.69231500  | 0.00658900  |
| Si | 0.00000000  | -2.10452999 | 1.97950397  | Si | -2.52863700 | -0.16008700 | -1.34767300 |
| Si | 0.00000000  | 0.00000000  | 3.06819593  | Si | 1.06338800  | -2.41044100 | -0.06160200 |
| Si | -0.00000000 | 2.10452999  | 1.97950397  | Si | -1.46900500 | -2.16204100 | -0.24453500 |
| Si | -1.30429990 | -2.20683605 | -0.28438689 | Si | 0.76943800  | 1.11750300  | 1.82724400  |
| Si | 0.00000000  | -1.20803006 | -2.25619205 | Si | 2.40638900  | -0.60157900 | 0.85506000  |
| Si | 2.07160305  | -0.00000000 | -1.30249485 | Si | 2.18555800  | -0.64934900 | -1.62174300 |
| Si | 1.30429990  | 2.20683605  | -0.28438689 | Si | 2.29455900  | 1.48902900  | -0.45680600 |
| Si | -1.30429990 | 2.20683605  | -0.28438689 | Si | -2.47995700 | -0.34107600 | 1.09762200  |
| Si | -2.07160305 | -0.00000000 | -1.30249485 | Si | -0.14029200 | -1.07370000 | 1.88607000  |
| Nb | 0.00000000  | 0.00000000  | 0.39930793  | Si | -2.10278200 | 1.85996900  | -0.14229000 |
| Si | -0.00000000 | 1.20803006  | -2.25619205 | Nb | -0.06326900 | 0.08176500  | -0.61392900 |
|    |             | 11C         |             |    | 11D         |             |             |
|    |             | X           | Y           | Z  | X           | Y           | Z           |
| Nb | -0.00000000 | 0.00000000  | 0.63175101  | Si | -1.98178900 | 2.35500221  | 0.00000000  |
| Si | -2.66040613 | -1.61257000 | 0.47281415  | Si | -1.70106319 | -2.28096880 | 0.00000000  |
| Si | -2.39639630 | 0.22976727  | -1.02710854 | Si | -0.31235899 | -2.02279102 | -1.96824081 |
| Si | -2.30794785 | 0.60181777  | 1.55461651  | Si | 0.86274603  | 0.15889091  | -2.13803048 |
| Si | -1.62027803 | 2.25952503  | 0.02204871  | Si | -0.16839367 | 2.23369000  | -1.62293924 |
| Si | 0.66385981  | 1.97753209  | -0.87223373 | Si | -0.16839367 | 2.23369000  | 1.62293924  |
| Si | -0.66385981 | -1.97753209 | -0.87223373 | Si | 0.86274603  | 0.15889091  | 2.13803048  |
| Si | 0.00000000  | 0.00000000  | -2.14951199 | Si | -0.31235899 | -2.02279102 | 1.96824081  |
| Si | 1.62027803  | -2.25952503 | 0.02204871  | Si | 0.94823880  | -2.55320591 | 0.00000000  |
| Si | 2.39639630  | -0.22976727 | -1.02710854 | Si | 2.22791489  | -0.29686196 | 0.00000000  |
| Si | 2.30794785  | -0.60181777 | 1.55461651  | Si | 1.58963698  | 1.96984207  | 0.00000000  |
| Si | 2.66040613  | 1.61257000  | 0.47281415  | Nb | -0.62840910 | 0.02339216  | 0.00000000  |

NbSi<sub>12</sub><sup>-</sup>

| 12A |             |             |             | 12B |             |             |             |
|-----|-------------|-------------|-------------|-----|-------------|-------------|-------------|
|     | X           | Y           | Z           | X   | Y           | Z           |             |
| Si  | 0.00000000  | -2.41554021 | -1.22437513 | Si  | 2.37046300  | 0.00463800  | 1.32761700  |
| Si  | 2.09191919  | -1.20777011 | -1.22437513 | Si  | -0.21741400 | 2.75519200  | -0.74673200 |
| Si  | 2.09191919  | 1.20777011  | -1.22437513 | Si  | -2.05665900 | -1.26510900 | -1.34482500 |
| Si  | -0.00000000 | 2.41554021  | -1.22437513 | Si  | -2.06191300 | 1.25851700  | -1.34425900 |
| Si  | -2.09191919 | 1.20777011  | -1.22437513 | Si  | 0.05305100  | 0.00028000  | 2.18679500  |
| Si  | -2.09191919 | -1.20777011 | -1.22437513 | Si  | -1.18610800 | -1.86117300 | 1.29961000  |
| Si  | 0.00000000  | -2.41554021 | 1.22437513  | Si  | -0.20716000 | -2.75613200 | -0.74743600 |
| Si  | 2.09191919  | -1.20777011 | 1.22437513  | Si  | 2.13376300  | -1.97344600 | -0.18360800 |
| Si  | 2.09191919  | 1.20777011  | 1.22437513  | Si  | -1.19417500 | 1.85748500  | 1.30129700  |
| Si  | 0.00000000  | 2.41554021  | 1.22437513  | Si  | -2.62666400 | -0.00490500 | 0.74359500  |
| Si  | -2.09191919 | 1.20777011  | 1.22437513  | Si  | 2.12757100  | 1.97949400  | -0.18788600 |
| Si  | -2.09191919 | -1.20777011 | 1.22437513  | Si  | 2.67044900  | 0.00262400  | -1.19989500 |
| Nb  | -0.00000000 | -0.00000000 | 0.00000000  | Nb  | 0.06651600  | 0.00086600  | -0.37706900 |
| 12C |             |             |             | 12D |             |             |             |
|     | X           | Y           | Z           | X   | Y           | Z           |             |
| Si  | 2.65650800  | 0.75021100  | -0.77242300 | Nb  | -0.00010300 | -0.17311800 | -0.15330800 |
| Si  | 1.10590400  | 2.56828900  | -0.91754100 | Si  | -2.08965100 | 1.08620500  | -1.21820500 |
| Si  | 1.05921900  | 1.69139800  | 1.38195800  | Si  | -2.01136000 | 1.21619200  | 1.19697300  |
| Si  | 2.03074400  | -0.46385000 | 1.44756700  | Si  | -2.02418900 | -1.46097400 | -1.15691900 |
| Si  | 2.29568600  | -1.56104800 | -0.82849500 | Si  | -1.96853300 | -1.16806500 | 1.41721200  |
| Si  | -1.40692700 | 2.41413200  | -0.90197300 | Si  | 0.00536100  | -2.43846000 | -1.74355800 |
| Si  | 0.16895800  | -1.95821100 | 1.36260200  | Si  | 0.00618000  | -1.08726100 | 2.61946300  |
| Si  | 0.17134500  | -2.78562800 | -0.94130900 | Si  | -0.00559200 | 2.22038100  | -1.69536600 |
| Si  | -1.33657100 | 1.50735900  | 1.39709800  | Si  | -0.00683900 | 2.42451700  | 0.79828300  |
| Si  | -2.72411200 | 0.44116500  | -0.75666700 | Si  | 2.08360300  | 1.09581000  | -1.21808600 |
| Si  | -1.91562200 | -0.77824100 | 1.43814000  | Si  | 2.00391000  | 1.22694700  | 1.19705300  |
| Si  | -2.10587600 | -1.81928200 | -0.84930100 | Si  | 2.02972500  | -1.44996200 | -1.16034700 |
| Nb  | 0.00025400  | -0.00214900 | -0.36183300 | Si  | 1.97768500  | -1.15834200 | 1.41247200  |

NbSi<sub>3</sub>

3A

|    | X           | Y           | Z           |
|----|-------------|-------------|-------------|
| Si | 0.77571700  | -1.33885100 | -0.79068200 |
| Si | 0.76827600  | 1.34876900  | -0.78133100 |
| Si | 1.23446400  | -0.00323700 | 1.23903000  |
| Nb | -0.94874100 | -0.00228100 | 0.11370100  |
| Si | 0.77571700  | -1.33885100 | -0.79068200 |

NbSi<sub>4</sub>

| 4A |             |             | 4B          |    |             |             |             |
|----|-------------|-------------|-------------|----|-------------|-------------|-------------|
|    | X           | Y           | Z           |    | X           | Y           | Z           |
| Si | 0.00000000  | -1.12046252 | 1.54358536  | Si | -0.00001500 | 0.49864900  | 1.64809800  |
| Si | -0.00000000 | 1.12046252  | 1.54358536  | Si | -1.91894900 | 0.50939700  | -0.16398100 |
| Si | 0.00000000  | -2.39479795 | -0.29838134 | Si | 1.91895500  | 0.50939400  | -0.16396400 |
| Si | -0.00000000 | 2.39479795  | -0.29838134 | Si | 0.00000700  | 1.61599700  | -0.76966100 |
| Nb | 0.00000000  | -0.00000000 | -0.85036390 | Nb | 0.00000000  | -1.06995400 | -0.18797300 |

NbSi<sub>5</sub>

| 5A |             |             | 5B          |    |             |             |             |
|----|-------------|-------------|-------------|----|-------------|-------------|-------------|
|    | X           | Y           | Z           |    | X           | Y           | Z           |
| Si | 0.00000000  | 0.00000000  | -2.03438401 | Si | 0.75923000  | -1.61416000 | 0.00644000  |
| Si | 0.00000000  | 1.86893026  | -0.40834072 | Si | 0.72301200  | 0.53754600  | 1.27764800  |
| Si | 0.00000000  | -1.86893026 | -0.40834072 | Si | -0.77756400 | 1.93297500  | -0.00726500 |
| Si | -1.86893026 | -0.00000000 | -0.40834072 | Si | 0.71677000  | 0.51959600  | -1.27231700 |
| Si | 1.86893026  | 0.00000000  | -0.40834072 | Nb | -1.39952000 | -0.47333800 | 0.00086000  |
| Nb | -0.00000000 | -0.00000000 | 1.25253699  | Si | 2.67714700  | 0.01024600  | -0.00702600 |
| 5C |             |             | 5D          |    |             |             |             |
|    | X           | Y           | Z           |    | X           | Y           | Z           |
| Si | 0.99879600  | 0.86267700  | -1.34884900 | Si | 1.72359836  | 1.69879346  | 0.00000000  |
| Si | -1.23154600 | 1.36363500  | -0.67058600 | Si | -0.94098916 | -0.78028905 | -1.23800566 |
| Si | 0.25473500  | 1.41931100  | 1.16843200  | Si | -2.69932789 | 0.49244238  | 0.00000000  |
| Si | 2.03850000  | -0.04852800 | 0.78220800  | Si | -0.52323370 | 1.39480293  | 0.00000000  |
| Si | -2.11967300 | -0.29338900 | 0.64124700  | Nb | 1.15452487  | -0.69148042 | 0.00000000  |
| Nb | 0.02021100  | -1.12809500 | -0.19547100 | Si | -0.94098916 | -0.78028905 | 1.23800566  |

NbSi<sub>6</sub>

| 6A |             |             | 6B          |    |             |             |             |
|----|-------------|-------------|-------------|----|-------------|-------------|-------------|
|    | X           | Y           | Z           |    | X           | Y           | Z           |
| Si | 2.21993800  | 0.00000000  | -0.44565700 | Si | 0.56645000  | 1.92667600  | 0.89387400  |
| Si | 0.84366100  | -1.91027100 | -0.18344500 | Si | -0.94863900 | 1.23542700  | -0.79143700 |
| Si | 0.83085000  | 0.00000000  | 1.65047200  | Si | 0.73566800  | -1.83769500 | 0.98109600  |
| Si | -1.18608800 | -1.43510600 | 0.99069800  | Si | -0.75904500 | -1.18835500 | -0.92980100 |
| Si | 0.84366100  | 1.91027100  | -0.18344500 | Si | -0.93477800 | -0.03737200 | 1.41686400  |
| Si | -1.18608800 | 1.43510600  | 0.99069800  | Si | -2.80189200 | -0.15064600 | -0.20427700 |
| Nb | -0.80788000 | 0.00000000  | -0.96269600 | Nb | 1.41442200  | 0.01774400  | -0.46654800 |
| 6C |             |             | 6D          |    |             |             |             |
|    | X           | Y           | Z           |    | X           | Y           | Z           |
| Si | 1.18452000  | 1.69015800  | 0.00000600  | Si | 1.18452000  | 1.69015800  | 0.00000600  |
| Si | -0.72651200 | 1.18090900  | 1.36766200  | Si | -0.72651200 | 1.18090900  | 1.36766200  |
| Si | 1.61981100  | -0.29235300 | -1.36465100 | Si | 1.61981100  | -0.29235300 | -1.36465100 |
| Si | -0.72652100 | 1.18093900  | -1.36764600 | Si | -0.72652100 | 1.18093900  | -1.36764600 |
| Si | 1.61981700  | -0.29236400 | 1.36464400  | Si | 1.61981700  | -0.29236400 | 1.36464400  |
| Nb | -0.20848800 | -1.19376700 | -0.00000700 | Nb | -0.20848800 | -1.19376700 | -0.00000700 |
| Si | -2.36054400 | 0.02874400  | 0.00000400  | Si | -2.36054400 | 0.02874400  | 0.00000400  |

NbSi<sub>7</sub>

| 7A |             |             | 7B          |    |             |             |             |
|----|-------------|-------------|-------------|----|-------------|-------------|-------------|
|    | X           | Y           | Z           |    | X           | Y           | Z           |
| Si | -1.01835820 | 1.08683974  | 1.54249446  | Si | -2.35008200 | 0.00000300  | 0.10526300  |
| Si | 0.12800622  | -0.96608246 | -1.98345171 | Si | -0.96492100 | 1.98409900  | -0.12664600 |
| Si | 0.17074488  | 2.40577194  | 0.00000000  | Si | -0.72709400 | -0.00000200 | 1.77024100  |
| Si | -0.10596104 | -2.35056795 | 0.00000000  | Si | 1.08642100  | 1.54177000  | 1.01889200  |
| Si | 0.12800622  | -0.96608246 | 1.98345171  | Si | -0.96492400 | -1.98409800 | -0.12664500 |
| Si | -1.76962039 | -0.72673228 | 0.00000000  | Si | 1.08642000  | -1.54177100 | 1.01889000  |
| Si | -1.01835820 | 1.08683974  | -1.54249446 | Si | 2.40629300  | 0.00000000  | -0.17212400 |
| Nb | 1.19106497  | 0.14683253  | 0.00000000  | Nb | 0.14610800  | 0.00000000  | -1.19098000 |
| 7C |             |             | 7D          |    |             |             |             |
|    | X           | Y           | Z           |    | X           | Y           | Z           |
| Si | -0.60142907 | -0.77380384 | 1.94262949  | Si | -1.30288300 | 2.04822000  | -0.56524000 |
| Si | -1.51540758 | -1.85974317 | 0.00000000  | Si | -1.25818300 | -0.00001300 | -1.63040200 |
| Si | -1.47894397 | 0.58255584  | 0.00000000  | Si | -1.30288700 | -2.04823200 | -0.56520800 |
| Si | -0.60142907 | -0.77380384 | -1.94262949 | Si | 0.93933300  | -1.37938300 | -0.51787800 |
| Si | 0.69608305  | 1.23226330  | 1.29289917  | Si | 1.57540500  | -0.00000600 | 1.40965900  |
| Si | 0.69608305  | 1.23226330  | -1.29289917 | Si | 2.87245100  | -0.00002900 | -0.74458500 |
| Nb | 1.16476125  | -0.84876774 | 0.00000000  | Si | 0.93936500  | 1.37941400  | -0.51786900 |
| Si | -0.59998232 | 2.84621398  | 0.00000000  | Nb | -0.84088800 | 0.00000900  | 1.06930000  |

NbSi<sub>8</sub>

|    |             | 8A          |             |    | 8B          |             |             |
|----|-------------|-------------|-------------|----|-------------|-------------|-------------|
|    | X           | Y           | Z           |    | X           | Y           | Z           |
| Si | -0.00000100 | -2.02931200 | 0.70849600  | Si | 1.53418800  | -0.35572900 | 1.67653400  |
| Si | 0.00000100  | 2.02931200  | 0.70849500  | Si | 0.69435600  | 1.98564400  | 0.40837100  |
| Si | -2.10263500 | -1.29364000 | -0.38056300 | Si | -1.11314800 | 1.30835400  | -1.00293200 |
| Si | -2.10263400 | 1.29364100  | -0.38056100 | Si | -0.01061200 | -2.04253500 | 0.89001200  |
| Si | 2.10263500  | -1.29364100 | -0.38056000 | Si | -1.77982300 | -1.06481400 | -0.64998700 |
| Si | 2.10263500  | 1.29364000  | -0.38056300 | Si | -3.05607800 | 0.65450100  | 0.47839300  |
| Si | 1.26397700  | 0.00000100  | 1.61248100  | Si | -0.85570600 | 0.31557800  | 1.38769700  |
| Si | -1.26397800 | 0.00000000  | 1.61248000  | Si | 2.64072800  | 0.76362100  | -0.17785800 |
| Nb | 0.00000000  | 0.00000000  | -1.06526500 | Nb | 0.66452000  | -0.53426100 | -1.02788300 |
|    |             | 8C          |             |    | 8D          |             |             |
|    | X           | Y           | Z           |    | X           | Y           | Z           |
| Si | 2.55847200  | -0.70789700 | -0.78652200 | Si | -0.70599600 | 0.00003500  | 1.88357900  |
| Si | 1.90150000  | 1.21371600  | 0.54096500  | Si | 3.10025000  | 0.00001700  | 0.89727100  |
| Si | 0.00000000  | 2.17891900  | -0.49353800 | Si | -2.64617300 | 0.00001100  | 0.55313600  |
| Si | -2.55847100 | -0.70789800 | -0.78652200 | Si | 1.99875000  | -0.00002300 | -1.25102700 |
| Si | -1.90150100 | 1.21371500  | 0.54096400  | Si | -1.21463200 | 2.00949900  | 0.15403700  |
| Si | -1.20202300 | -1.49603600 | 1.03850400  | Si | -1.21463200 | -2.00949200 | 0.15411200  |
| Si | 1.20202400  | -1.49603700 | 1.03850200  | Si | 1.01719500  | 1.32004600  | 0.60269900  |
| Si | 0.00000000  | 0.54398800  | 1.85452000  | Si | 1.01719600  | -1.32002300 | 0.60274700  |
| Nb | 0.00000000  | -0.25352600 | -1.00624900 | Nb | -0.46164400 | -0.00002300 | -1.22809200 |

NbSi<sub>9</sub>

|    |             |             |             | 9A |             |             | 9B          |   |   |  |
|----|-------------|-------------|-------------|----|-------------|-------------|-------------|---|---|--|
|    |             |             |             | X  | Y           | Z           | X           | Y | Z |  |
| Si | -1.23742800 | -2.22556600 | 0.01449900  | Nb | -0.12693800 | -0.29662000 | -0.87468200 |   |   |  |
| Si | 2.07845200  | -1.63396400 | -0.67454800 | Si | -2.02337200 | 1.46695300  | -0.29998000 |   |   |  |
| Si | 2.46848300  | 0.57109200  | 0.30936600  | Si | -2.72508400 | -0.78470900 | -0.98535700 |   |   |  |
| Si | 0.92288900  | 2.12934300  | -0.82894800 | Si | -1.78698200 | -0.89985200 | 1.21054400  |   |   |  |
| Si | -2.52335900 | -0.01759500 | -0.82785000 | Si | 0.44384600  | -1.70638300 | 1.33386200  |   |   |  |
| Si | -1.38806900 | 2.02396700  | 0.10900700  | Si | -0.59648200 | 1.28079700  | 1.62523000  |   |   |  |
| Si | -1.53249000 | -0.23753800 | 1.53981100  | Si | 0.62034700  | 2.05757400  | -0.42337000 |   |   |  |
| Si | 0.72052300  | -1.28016200 | 1.46377000  | Si | 1.63855800  | 0.35388900  | 1.38335500  |   |   |  |
| Si | 0.48435200  | 1.22200900  | 1.64129400  | Si | 2.81318800  | 0.68413100  | -0.64337600 |   |   |  |
| Nb | 0.00227000  | -0.18834700 | -0.93779500 | Si | 1.98772800  | -1.58372600 | -0.63933900 |   |   |  |
|    |             |             |             | 9C |             |             | 9D          |   |   |  |
|    |             |             |             | X  | Y           | Z           | X           | Y | Z |  |
| Si | -2.27907800 | 1.12192100  | -0.64194400 | Si | -2.46885500 | -0.40838800 | -0.81078800 |   |   |  |
| Si | -0.40029200 | -2.20627500 | 0.11359700  | Si | 0.94238100  | -2.09938300 | 0.43060100  |   |   |  |
| Si | 2.71239900  | 0.28819600  | 0.45273800  | Si | 2.45783100  | 1.58992900  | 0.08478100  |   |   |  |
| Si | 1.96104700  | -1.59313900 | -0.84186100 | Si | 2.54758400  | -0.73655000 | -0.65501400 |   |   |  |
| Si | -1.30699200 | -0.14435500 | 1.54116400  | Si | -1.29508200 | 0.13770600  | 1.49858500  |   |   |  |
| Si | 1.40855200  | 2.20756300  | -0.17360500 | Si | 0.13528400  | 2.07675900  | 0.16646000  |   |   |  |
| Si | -0.74656900 | 2.10566400  | 0.88306600  | Si | -2.26919700 | 1.86651400  | 0.08646000  |   |   |  |
| Si | 1.00154600  | -1.00197100 | 1.59130700  | Si | 1.31045400  | 0.02226700  | 1.60346200  |   |   |  |
| Si | -2.61129400 | -1.24538900 | -0.21849100 | Si | -1.46910400 | -2.08030900 | 0.56082300  |   |   |  |
| Nb | 0.08901300  | 0.15973100  | -0.92399000 | Nb | 0.03711800  | -0.12584400 | -1.01256500 |   |   |  |

NbSi<sub>10</sub>

|    |             |             |             | 10A |             |             | 10B         |   |   |  |
|----|-------------|-------------|-------------|-----|-------------|-------------|-------------|---|---|--|
|    |             |             |             | X   | Y           | Z           | X           | Y | Z |  |
| Si | -2.12778978 | -0.18328592 | -1.44242630 | Nb  | 0.51420290  | -0.25202500 | 0.00000000  |   |   |  |
| Si | -2.10782553 | -2.11602264 | 0.00000000  | Si  | -0.26531597 | -2.35208368 | -1.59922415 |   |   |  |
| Si | 2.52087335  | -1.68356346 | 0.00000000  | Si  | 1.40009480  | -2.66802604 | 0.00000000  |   |   |  |
| Si | -2.12778978 | -0.18328592 | 1.44242630  | Si  | -0.26531597 | -2.35208368 | 1.59922415  |   |   |  |
| Si | -1.54708651 | 1.67203850  | 0.00000000  | Si  | -1.10290410 | -0.18511431 | 2.04507065  |   |   |  |
| Si | 0.00162701  | 1.03511953  | -2.06534425 | Si  | -1.10290410 | -0.18511431 | -2.04507065 |   |   |  |
| Si | 2.15054019  | 0.03506194  | -1.60530055 | Si  | -2.17900408 | 0.47584510  | 0.00000000  |   |   |  |
| Si | 2.15054019  | 0.03506194  | 1.60530055  | Si  | 0.43248701  | 1.73504736  | -1.96268975 |   |   |  |
| Si | 0.00162701  | 1.03511953  | 2.06534425  | Si  | -0.69024600 | 2.50358904  | 0.00000000  |   |   |  |
| Nb | 0.12079209  | -0.65814507 | 0.00000000  | Si  | 1.83433698  | 2.03140595  | 0.00000000  |   |   |  |
| Si | 0.73138134  | 2.28283108  | 0.00000000  | Si  | 0.43248701  | 1.73504736  | 1.96268975  |   |   |  |
|    |             |             |             | 10C |             |             | 10D         |   |   |  |
|    |             |             |             | X   | Y           | Z           | X           | Y | Z |  |
| Si | -1.20863600 | -2.28247100 | -0.83756100 | Si  | -1.18013100 | -2.30190700 | -0.36780400 |   |   |  |
| Si | 2.86399500  | -0.46554300 | -0.20024900 | Si  | 1.19016200  | -2.30760200 | -0.36541900 |   |   |  |
| Si | -0.01072800 | 2.70366600  | 0.20148200  | Si  | 2.68480300  | -0.57320100 | -0.93326300 |   |   |  |
| Si | 2.04347600  | 1.66294300  | -0.47244500 | Si  | -2.04264700 | 1.84041800  | -0.09121800 |   |   |  |
| Si | -0.68892000 | -1.56329700 | 1.41461900  | Si  | -2.69567200 | -0.58147900 | -0.92114700 |   |   |  |
| Si | -1.12501500 | 0.87948400  | 1.63741700  | Si  | -1.96333300 | -0.13592500 | 1.31360000  |   |   |  |
| Si | -1.92598200 | 1.69635700  | -0.73175600 | Si  | 0.01930400  | -1.29600500 | 1.69863800  |   |   |  |
| Si | -2.61115800 | -0.46531700 | -0.04934300 | Si  | 1.98432600  | -0.10427000 | 1.29998100  |   |   |  |
| Si | 1.22929100  | 0.04373500  | 1.67294400  | Si  | 2.01812700  | 1.87515600  | -0.09398000 |   |   |  |
| Si | 1.27586200  | -2.26245100 | -0.08776500 | Si  | -0.02048600 | 2.92162700  | 0.16614300  |   |   |  |
| Nb | 0.05388800  | 0.01806100  | -0.86982400 | Nb  | 0.00189400  | 0.22645500  | -0.58237600 |   |   |  |

NbSi<sub>11</sub>

|    |             | 11A         |             |    | 11B         |             |             |
|----|-------------|-------------|-------------|----|-------------|-------------|-------------|
|    | X           | Y           | Z           | X  | Y           | Z           |             |
| Si | 0.16753900  | 2.73389200  | -0.06613800 | Si | -2.35348112 | -0.38897321 | -1.55003980 |
| Si | -2.49200500 | -0.14043700 | -1.32765500 | Si | 2.35348112  | 0.38897321  | -1.55003980 |
| Si | 1.11569700  | -2.42162300 | -0.06222600 | Si | 1.83948989  | 2.16682303  | -0.06467423 |
| Si | -1.38704000 | -2.19987700 | -0.25881000 | Si | -0.44314301 | 2.01862791  | 0.82831999  |
| Si | 0.55942500  | 1.15042000  | 1.78843400  | Si | -2.51684612 | 1.72152679  | -0.37001980 |
| Si | 2.32255500  | -0.54991200 | 0.97192100  | Si | -1.83948989 | -2.16682303 | -0.06467423 |
| Si | 2.26972700  | -0.67620200 | -1.47070900 | Si | 0.44314301  | -2.01862791 | 0.82831999  |
| Si | 2.29848500  | 1.54954500  | -0.31122600 | Si | 2.51684612  | -1.72152679 | -0.37001980 |
| Si | -2.51095300 | -0.44349500 | 1.05073000  | Si | 2.35178411  | 0.13878207  | 1.09316673  |
| Si | -0.15800500 | -1.10759400 | 1.85621300  | Si | -0.00000000 | 0.00000000  | 2.14678796  |
| Si | -2.07178800 | 1.84832400  | -0.02755900 | Si | -2.35178411 | -0.13878207 | 1.09316673  |
| Nb | -0.03880300 | 0.08774200  | -0.73174800 | Nb | 0.00000000  | 0.00000000  | -0.68908704 |
|    |             | 11C         |             |    | 11D         |             |             |
|    | X           | Y           | Z           | X  | Y           | Z           |             |
| Si | -2.35348112 | -0.38897321 | -1.55003980 | Si | 0.53160900  | 2.22313900  | -1.32429900 |
| Si | 2.35348112  | 0.38897321  | -1.55003980 | Si | -1.57807900 | 2.17228800  | -0.03772900 |
| Si | 1.83948989  | 2.16682303  | -0.06467423 | Si | -3.12243000 | 0.39037800  | -0.26401200 |
| Si | -0.44314301 | 2.01862791  | 0.82831999  | Si | -2.44968200 | -1.76368800 | -0.22018400 |
| Si | -2.51684612 | 1.72152679  | -0.37001980 | Si | 0.06599000  | 1.77422900  | 1.82668500  |
| Si | -1.83948989 | -2.16682303 | -0.06467423 | Si | 2.03138700  | 1.39587000  | 0.42982500  |
| Si | 0.44314301  | -2.01862791 | 0.82831999  | Si | 1.63199200  | 0.11958600  | -1.93610700 |
| Si | 2.51684612  | -1.72152679 | -0.37001980 | Si | 1.13362600  | -2.16153500 | -1.12438800 |
| Si | 2.35178411  | 0.13878207  | 1.09316673  | Si | -0.37962000 | -2.48350600 | 0.79461300  |
| Si | -0.00000000 | 0.00000000  | 2.14678796  | Si | 0.76508000  | -0.46823000 | 2.10148100  |
| Si | -2.35178411 | -0.13878207 | 1.09316673  | Nb | -0.38498600 | -0.10141300 | -0.24039400 |
| Nb | 0.00000000  | 0.00000000  | -0.68908704 | Si | 2.49758500  | -0.90153600 | 0.45812600  |



NbSi<sub>12</sub>

|    |             | 12A         |             |    | 12B         |             |             |
|----|-------------|-------------|-------------|----|-------------|-------------|-------------|
|    | X           | Y           | Z           |    | X           | Y           | Z           |
| Si | 0.00000000  | 2.43034174  | -1.20510123 | Si | -1.29732385 | 2.37477794  | 0.00000000  |
| Si | -2.10473768 | 1.21517087  | -1.20510123 | Si | 0.61519779  | -0.18796343 | -2.67039788 |
| Si | -2.10473768 | -1.21517087 | -1.20510123 | Si | 1.36428885  | -2.10363219 | 1.26999322  |
| Si | 0.00000000  | -2.43034174 | -1.20510123 | Si | 1.36428885  | -2.10363219 | -1.26999322 |
| Si | 2.10473768  | -1.21517087 | -1.20510123 | Si | -2.16920904 | 0.08435301  | 0.00000000  |
| Si | 2.10473768  | 1.21517087  | -1.20510123 | Si | -1.33243805 | -1.23616092 | 1.80442031  |
| Si | 0.00000000  | 2.43034174  | 1.20510123  | Si | 0.61519779  | -0.18796343 | 2.67039788  |
| Si | -2.10473768 | 1.21517087  | 1.20510123  | Si | 0.16806725  | 2.21886797  | 1.98271696  |
| Si | -2.10473768 | -1.21517087 | 1.20510123  | Si | -1.33243805 | -1.23616092 | -1.80442031 |
| Si | -0.00000000 | -2.43034174 | 1.20510123  | Si | -0.68734626 | -2.66340112 | 0.00000000  |
| Si | 2.10473768  | -1.21517087 | 1.20510123  | Si | 0.16806725  | 2.21886797  | -1.98271696 |
| Si | 2.10473768  | 1.21517087  | 1.20510123  | Si | 1.25445117  | 2.60705672  | 0.00000000  |
| Nb | 0.00000000  | 0.00000000  | -0.00000000 | Nb | 0.43336096  | 0.07349179  | 0.00000000  |
|    |             | 12C         |             |    | 12D         |             |             |
|    | X           | Y           | Z           |    | X           | Y           | Z           |
| Nb | 0.00000000  | -0.00000000 | -0.17164904 | Si | 0.82371482  | 0.64442868  | 2.65692323  |
| Si | 1.21654352  | 2.06246794  | 1.17140283  | Si | 0.70110806  | 2.56505082  | 1.28862140  |
| Si | -1.21654352 | 2.06246794  | 1.17140283  | Si | -1.45771601 | 1.46952799  | 1.20499113  |
| Si | 1.26686274  | 2.01430188  | -1.26123310 | Si | -1.36392523 | -0.72784209 | 1.95846893  |
| Si | -1.26686274 | 2.01430188  | -1.26123310 | Si | 0.89393467  | -1.67274430 | 2.40315402  |
| Si | 2.29997982  | -0.00000000 | -1.90792588 | Si | 0.70110806  | 2.56505082  | -1.28862140 |
| Si | -2.29997982 | -0.00000000 | -1.90792588 | Si | -1.40839817 | -2.02584690 | 0.00000000  |
| Si | 1.23405168  | -0.00000000 | 2.33572558  | Si | 0.86931879  | -2.57309007 | 0.00000000  |
| Si | -1.23405168 | -0.00000000 | 2.33572558  | Si | -1.45771601 | 1.46952799  | -1.20499113 |
| Si | 1.21654352  | -2.06246794 | 1.17140283  | Si | 0.82371482  | 0.64442868  | -2.65692323 |
| Si | -1.21654352 | -2.06246794 | 1.17140283  | Si | -1.36392523 | -0.72784209 | -1.95846893 |
| Si | 1.26686274  | -2.01430188 | -1.26123310 | Si | 0.89393467  | -1.67274430 | -2.40315402 |
| Si | -1.26686274 | -2.01430188 | -1.26123310 | Nb | 0.45967098  | 0.01108696  | 0.00000000  |
